# Supplementary material for: DCMC as a Promising Alternative to Bentonite in White Wine Stabilization. Impact on Protein Stability and Wine Aromatic Fraction
Source: MDPI journal article supplement (doi:10.3390/molecules26206188), 2021-10-14
Supplement: s1 [file s1]

Table S1. -Routine analyses of the three 2018 studied wines; values are mean  $\pm$  SD (n = 3).

| Wine                | Free SO <sub>2</sub> (mg/L) | Total SO <sub>2</sub> (mg/L) | pH           | Total acidity (g/L of tartaric acid) | Volatile acidity (g/L of acetic acid) | Alcohol (% v/v) | Reducing substances (g/L) |
|---------------------|-----------------------------|------------------------------|--------------|--------------------------------------|---------------------------------------|-----------------|---------------------------|
| Encruzado           | 25 $\pm$ 0                  | 90 $\pm$ 0                   | 3.12 $\pm$ 0 | 8.4 $\pm$ 0.11                       | 0.28 $\pm$ 0.03                       | 13.5 $\pm$ 0.01 | 0.1 $\pm$ 0               |
| Viosinho            | 28 $\pm$ 0                  | 82 $\pm$ 0                   | 3.28 $\pm$ 0 | 7.4 $\pm$ 0.06                       | 0.4 $\pm$ 0.01                        | 16 $\pm$ 0.02   | 1.2 $\pm$ 0.01            |
| Moscatel de Setúbal | 21 $\pm$ 0                  | 80 $\pm$ 0                   | 3.47 $\pm$ 0 | 6 $\pm$ 0.11                         | 0.32 $\pm$ 0.01                       | 14.1 $\pm$ 0.0  | 0.43 $\pm$ 0.02           |

  

| Wine                | Dry matter (g/L) | Colour (AU)   | Total phenols (mg/L of gallic acid) | Non-flavonoids (mg/L of gallic acid) | Flavonoids (mg/L of gallic acid) | Chloride (mg NaCl/L) | Sulphates (g/L of potassium sulphate) |
|---------------------|------------------|---------------|-------------------------------------|--------------------------------------|----------------------------------|----------------------|---------------------------------------|
| Encruzado           | 22.2 $\pm$ 0.18  | 0.067 $\pm$ 0 | 192.6 $\pm$ 1.4                     | 67.8 $\pm$ 1.4                       | 124.8 $\pm$ 1                    | 8.12 $\pm$ 0.1       | 0.2 $\pm$ 0.03                        |
| Viosinho            | 23.6 $\pm$ 0.35  | 0.066 $\pm$ 0 | 227.5 $\pm$ 3.5                     | 77.5 $\pm$ 1.1                       | 149.6 $\pm$ 1.7                  | 12.72 $\pm$ 0.18     | 0.2 $\pm$ 0.01                        |
| Moscatel de Setúbal | 21.4 $\pm$ 0.1   | 0.048 $\pm$ 0 | 189.6 $\pm$ 1.8                     | 68.0 $\pm$ 1.7                       | 121.6 $\pm$ 2.3                  | 10.97 $\pm$ 0.13     | 0.1 $\pm$ 0.01                        |

  

| Wine                | Tartaric stability (%) | Cu (mg/L)     | Fe (mg/L)       | Ca (mg/L)        | Mg (mg/L)         | Na (mg/L)       | K(mg/L)          |
|---------------------|------------------------|---------------|-----------------|------------------|-------------------|-----------------|------------------|
| Encruzado           | 10.7 $\pm$ 1           | <0.01 $\pm$ 0 | 0.75 $\pm$ 0.01 | 55.59 $\pm$ 1    | 68.42 $\pm$ 0.9   | 6.76 $\pm$ 0.17 | 756.57 $\pm$ 3   |
| Viosinho            | 3.6 $\pm$ 0.8          | <0.01 $\pm$ 0 | 0.81 $\pm$ 0.01 | 44.13 $\pm$ 0.5  | 87.49 $\pm$ 0.8   | 9.85 $\pm$ 0.25 | 525.04 $\pm$ 1.5 |
| Moscatel de Setúbal | 7.8 $\pm$ 0.07         | 0.062 $\pm$ 0 | 0.60 $\pm$ 0.01 | 42.78 $\pm$ 0.45 | 74.50 $\pm$ 0.5 7 | 7.63 $\pm$ 0.25 | 808.60 $\pm$ 2.5 |
